# Supplementary material for: Decoding fMRI alcohol cue reactivity and its association with drinking behaviour
Source: HighWire-hosted journal article supplement (doi:10.1136/bmjment-2022-300639), 2023-02-01
Supplement: bmjment-2022-300639supp001_data_supplement.pdf [file bmjment-2022-300639supp001_data_supplement.pdf]

Supplementary Materials for

**Decoding fMRI alcohol cue-reactivity and its association with  
drinking behavior**

Haoye Tan,<sup>1</sup> Martin Fungisai Gerchen,<sup>2,3,4</sup> Patrick Bach,<sup>1</sup> Alycia M. Lee,<sup>1</sup> Oliver Hummel,<sup>5</sup>  
Wolfgang H. Sommer,<sup>1,6,7</sup> Peter Kirsch,<sup>2,3,4</sup> Falk Kiefer<sup>1,8,9</sup> and Sabine Vollstädt-Klein<sup>1,8</sup>

Corresponding author: Haoye Tan. Email: haoye.tan@zi-mannheim.de

**This PDF file includes:**

Supplementary Methods  
Supplementary Table 1 to Supplementary Table 6  
Supplementary Figure 1  
Supplementary Reference

## Supplementary Methods

### Participants

The patients did not use other substances except nicotine, which was verified by a urine drug screening (nal von minden GmbH Drug-Screen® Diptest, Version 1.0). The healthy participants had no history of alcohol or drug addiction or any current psychiatric disorder, assessed by applying the Structured Clinical Interview for DSM-IV and -5 (SCID). Participants in both groups were excluded if they had any history of serious medical (including psychiatric or neurological) complications, brain injury, use of psychotropic medications (other than during the detoxification process), or did not meet magnetic resonance safety criteria for our imaging facility.

Before taking part in the scanning procedure, participants completed the following questionnaires: the Alcohol Dependence Scale (ADS, <sup>1</sup>), the Alcohol Urge Questionnaire (AUQ, <sup>2</sup>), the Obsessive Compulsive Drinking Scale (OCDS, <sup>3,4</sup>), FORM 90 <sup>5</sup> and visual analogue scale (VAS) ranging from 0 (no craving) to 100 (extremely extensive craving). The calculation rules of OCDS was based on the study from Mann et. al <sup>4</sup>.

### Details of cue-reactivity tasks and RDMs

The alcohol cue-reactivity (ALCUE) task was block-designed, in which one block consisted of five stimuli, each presented for 4 seconds, resulting in a total duration of 20 sec per block. Alcohol stimuli were taken from an own alcohol picture series <sup>6</sup>, while neutral cues were taken from the International Affective Picture Series <sup>7</sup>. After each block participants were asked to indicate their subjective craving for alcohol on a visual analogue scale ranging from 0 ('no craving at all') to 100 ('severe craving'). Participants had to rate their subjective craving in a maximum period of 10 sec. Thereafter a black fixation cross was presented on a white background for a minimum of 10 sec. The data in this study were from previous projects, and there were three versions of cue-reactivity tasks, including ALCUE, ALCUE-short, and ALCUEPV. The version of ALCUE tasks had different numbers of blocks: ALCUE had 30 blocks (18 alcohol + 12 neutral), ALCUE-short had 20 blocks (12 alcohol + 8 neutral), and ALCUEPV had 24 blocks (12 alcohol + 12 neutral). All these versions had same picture presenting blocks, which consisted of five pictures, each presented for 4 seconds. The ALCUEPV version had no have craving rating parts, which was replaced with 20 seconds fixations. The percentages of ALCUE and ALCUEPV in AUD and Healthy groups were not significantly different.

For Visual Object Recognition, the dimensions of RDMs were 150x150, 100x100 and 120x120 for the three versions of the task, and the Reward Appraisal model only included the alcoholic pictures, the dimensions of RDMs were 90x90, 60x60 and 60x60. The RDMs of neural activity were in same dimensions respectively with the Visual Object Recognition and Reward Appraisal models.

### Visual Object Recognition (VOR) model construction

For the VOR model, we used a pre-trained deep convolutional neural network (dCNN) to obtain the visual decoding information of the stimuli of the cue-reactivity task <sup>8,9</sup>. Previous studies demonstrated high layers of visual dCNN containing high-dimensional representations of objects and complex features in visual recognition <sup>9,10</sup>. In this study, the dCNN model based on the ImageNet dataset <sup>11</sup>, VGG19 <sup>8</sup>, was used to recognize the stimulus pictures with the MatConvNet

toolbox (<https://www.vlfeat.org/matconvnet/>), and connected layers of the neural network were used to construct the model RDMs.

#### Connectivity analyses

Based on the identified regions of neural representations of alcohol cue-reactivity, seed-to-voxel psychophysiological interaction (PPI) analyses<sup>12</sup> were performed with the CONN toolbox v20.b (<https://web.conn-toolbox.org/>)<sup>13</sup>.

**Supplementary Table 1. Information of included studies**

| Study name                         | Inclusion criterion *                                                                                                                                         | Sample size |     | ClinicalTrials/<br>German Clinical<br>Trials Register<br>(DRKS) |
|------------------------------------|---------------------------------------------------------------------------------------------------------------------------------------------------------------|-------------|-----|-----------------------------------------------------------------|
|                                    |                                                                                                                                                               | AUD         | HC  |                                                                 |
| Transalc <sup>14</sup>             | 1) alcohol use disorder according to DSM-5;<br>2) for heavy-drinker, at least 84g pure alcohol in the previous 90 day;<br>3) treatment-seeking and abstinent. | 30          | 36  | DRKS:<br>DRKS00003357                                           |
| SFB_Haupt/<br>NGFN13 <sup>15</sup> | 1) alcohol dependence according to the DSM-IV and ICD 10;<br>3) treatment-seeking and abstinent.                                                              | 79          | 71  | ClinicalTrials:<br>NCT00926900                                  |
| SFB_Folgestu<br>die <sup>16</sup>  | 1) alcohol dependence according to the DSM-IV and ICD 10;<br>3) treatment-seeking and abstinent.                                                              | 80          | 52  | DRKS:<br>DRKS00003388                                           |
| eMEDs <sup>17</sup>                | 1) alcohol dependence according to the DSM-IV and ICD 10;<br>2) treatment-seeking and abstinent.                                                              | 28          | 57  | DRKS:<br>DRKS00003341                                           |
| NALCUE <sup>18</sup>               | 1) alcohol use disorder according to the DSM-5;<br>2) at least 60g for men and 40g for women pure alcohol, at least 5 days/week;<br>3) non-treatment-seeking. | 21          | 0   | ClinicalTrials:<br>NCT02372318                                  |
| Oxytocin <sup>19</sup>             | healthy participants **                                                                                                                                       | 0           | 13  | DRKS:<br>DRKS00009253                                           |
| Total sample size:                 |                                                                                                                                                               | 238         | 229 |                                                                 |

Abbreviations: diagnostic and statistical manual of mental disorders (DSM), international classification of diseases (ICD), alcohol use disorder (AUD), healthy control (HC).

\* General criterion of inclusion and exclusion:

These studies included AUD individuals who 1) between 18 and 75 years, 2) right-handed; and excluded AUD individuals who 1) comorbid axis-I disorders (other than nicotine dependence) in the last year, 2) treatment with psychotropic or anticonvulsive medications in the last three months, 3) severe neurological or physiological disease (i.e. liver cirrhosis), 4) positive drug screening, 5) ineligibility for MRI scanning (e.g. metal implants), 6) history of severe head trauma.

These studies included healthy participants/light to moderate drinkers who 1) were aged between 18 and 75 years, 2) right-handed, 3) had an average alcohol consumption below 14g pure alcohol;

and excluded healthy participants who 1) comorbid axis-I disorders (other than nicotine dependence) in the last year, 2) treatment with psychotropic or anticonvulsive medications in the

last three months, 3) severe neurological or physiological disease (i.e. liver cirrhosis), 4) positive drug screening, 5) ineligibility for MRI scanning (e.g. metal implants), 6) history of severe head trauma.

\*\* light to moderate drinkers were classified as healthy participants.

**Supplementary Table 2 Group characteristics of all participants (N=467)**

|                                                                      | AUD Individuals       | Healthy Controls    | Statistics<br>(T/ $\chi^2$ -value) | df  | p-value |
|----------------------------------------------------------------------|-----------------------|---------------------|------------------------------------|-----|---------|
| N                                                                    | 238                   | 229                 |                                    |     |         |
| Sex (female)                                                         | 53, 22.3%             | 50, 21.8%           | 0                                  | 1   | 0.999   |
| Age (years)                                                          | 47 $\pm$ 10.8         | 45.7 $\pm$ 12.7     | 1.139                              | 465 | 0.255   |
| ADS score                                                            | 13.7 $\pm$ 7          | 2.4 $\pm$ 3.6       | 11.722                             | 171 | <0.001  |
| AUQ score                                                            | 12.8 $\pm$ 5.7        | 10.1 $\pm$ 3.5      | 4.936                              | 328 | <0.001  |
| OCDS global <sup>a</sup>                                             | 15.4 $\pm$ 6.8        | 2.9 $\pm$ 4.1       | 16.63                              | 279 | <0.001  |
| Cumulative amount of alcohol (gram in the last 90 days) <sup>b</sup> | 13608.3 $\pm$ 12462.5 | 1095.2 $\pm$ 4035.4 | 8.824                              | 260 | <0.001  |

Abbreviations: Alcohol Dependence Scale (ADS), Alcohol Urge Questionnaire (AUQ) and the Obsessive Compulsive Drinking Scale (OCDS)

<sup>a</sup>The calculation rules of OCDS was based on Mann et. al. <sup>4</sup>.

<sup>b</sup>The amount of drink was based on FORM90.

**Supplementary Table 3. Different Neural Representation of VOR and RA between AUD and healthy individuals**

| ROI Names | AAL Label (size)                                                                                                                                                                                                              | Brodmann Label (size)                                                                                                                                                                                              | Cluster size | MNI coordinate | tmax   |
|-----------|-------------------------------------------------------------------------------------------------------------------------------------------------------------------------------------------------------------------------------|--------------------------------------------------------------------------------------------------------------------------------------------------------------------------------------------------------------------|--------------|----------------|--------|
| VOR1      | Supp_Motor_Area_R (111)<br>Frontal_Sup_R (3)                                                                                                                                                                                  | BA6: premotor cortex and supplementary motor cortex (12)                                                                                                                                                           | 114          | 10 -4 60       | 4.9028 |
| VOR2      | Precentral_R (74)<br>Postcentral_R (46)                                                                                                                                                                                       | BA4: primary motor cortex (36)<br>BA3: primary somatosensory cortex (27)                                                                                                                                           | 120          | 48 -18 48      | 4.8782 |
| RA1       | Occipital_Sup_L (140)<br>Cuneus_L (67)<br>Occipital_Mid_L (57)                                                                                                                                                                | BA18: secondary visual cortex_V2 (35)<br>BA19: associative visual cortex (V3, V4 & V5) (32)<br>BA31: cingulate cortex (5)<br>BA7: visuo-motor coordination (3)                                                     | 264          | -16 -86 26     | 5.3685 |
| RA2       | Temporal_Mid_R (327)<br>Temporal_Sup_R (136)<br>Temporal_Pole_Mid_R (6)<br>Amygdala_R (3)<br>Temporal_Inf_R (1)                                                                                                               | BA21: middle temporal gyrus (192)                                                                                                                                                                                  | 543          | 68 -14 -14     | 5.1199 |
| RA3       | Frontal_Inf_Tri_L (185)<br>Frontal_Inf_Orb_L (147)<br>Frontal_Mid_Orb_L (83)<br>Frontal_Mid_L (44)                                                                                                                            | BA47: pars orbitalis, part of the inferior frontal gyrus (58)<br>BA11: orbitofrontal area (31)<br>BA10: anterior prefrontal cortex (9)<br>BA46: dorsolateral prefrontal cortex (2)<br>BA45: part of Broca area (1) | 495          | -42 46 -12     | 4.8378 |
| RA4       | Putamen_R (91)<br>Caudate_R (75)<br>Pallidum_R (19)<br>Hippocampus_L (16)<br>Olfactory_R (12)<br>Amygdala_L (12)<br>Frontal_Mid_Orb_R (3)<br>Frontal_Inf_Orb_R (2)<br>Insula_R (2)<br>Frontal_Sup_Orb_R (1)<br>Pallidum_L (1) | BA25: subgenual area (12)<br>BA47: pars orbitalis, part of the inferior frontal gyrus (3)<br>BA11: orbitofrontal area (2)<br>BA13: insular cortex (1)<br>BA34: dorsal entorhinal cortex (1)                        | 512          | 22 8 -4        | 4.8361 |
| RA5       | Precentral_R (114)<br>Frontal_Inf_Oper_R (105)<br>Rolandic_Oper_R (20)<br>Insula_R (12)                                                                                                                                       | BA6: premotor cortex and supplementary motor cortex (38)<br>BA9: dorsolateral prefrontal cortex (13)                                                                                                               | 374          | 40 0 30        | 4.6263 |

|      |                                                                                                                                                                              |                                                                                                                                                                                    |     |            |        |
|------|------------------------------------------------------------------------------------------------------------------------------------------------------------------------------|------------------------------------------------------------------------------------------------------------------------------------------------------------------------------------|-----|------------|--------|
|      | Frontal_Mid_R (7)                                                                                                                                                            | BA13: insular cortex (13)<br>BA44: part of Broca area (6)                                                                                                                          |     |            |        |
| RA6  | Frontal_Mid_L (204)<br>Precentral_L (165)<br>Frontal_Sup_L (119)<br>Frontal_Inf_Oper_L (111)<br>Frontal_Inf_Tri_L (60)<br>Frontal_Sup_Medial_L (26)<br>Supp_Motor_Area_L (7) | BA8: frontal eye fields (193)<br>BA9: dorsolateral prefrontal cortex (134)<br>BA6: premotor cortex and supplementary motor cortex (13)<br>BA46: dorsolateral prefrontal cortex (1) | 721 | -52 12 28  | 4.6095 |
| RA7  | Temporal_Mid_L (109)<br>Temporal_Sup_L (9)                                                                                                                                   | BA21: middle temporal gyrus (55)                                                                                                                                                   | 121 | -64 -4 -16 | 4.4758 |
| RA8  | Calcarine_L (81)<br>Lingual_L (6)<br>Precuneus_L (1)                                                                                                                         | BA21: middle temporal gyrus (55)<br>BA30: cingulate cortex (30)<br>BA18: secondary visual cortex_V2 (3)                                                                            | 88  | -16 -64 6  | 4.3857 |
| RA9  | Lingual_R (57)<br>Calcarine_R (45)<br>Vermis_4_5 (13)                                                                                                                        | BA30: cingulate cortex (34)<br>BA18: secondary visual cortex_V2 (12)<br>BA29: cingulate cortex (1)                                                                                 | 116 | 18 -54 4   | 4.3199 |
| RA10 | Occipital_Mid_R (67)<br>Occipital_Sup_R (38)                                                                                                                                 | BA19: associative visual cortex_V3, V4 & V5 (16)                                                                                                                                   | 105 | 30 -80 24  | 4.219  |
| RA11 | Lingual_R (77)<br>Vermis_3 (5)<br>Cerebelum_4_5_R (4)<br>ParaHippocampal_R (2)<br>Thalamus_R (2)                                                                             | BA30: cingulate cortex (12)<br>BA27: piriform cortex (9)<br>BA19: associative visual cortex_V3, V4 & V5 (2)                                                                        | 142 | 10 -34 -2  | 4.1889 |
| RA12 | Frontal_Inf_Tri_R (114)                                                                                                                                                      | BA45: part of Broca area (45)<br>BA46: dorsolateral prefrontal cortex (6)                                                                                                          | 114 | 56 38 8    | 4.0697 |

Two-sample t-tests were used between Alcohol Use Disorder (N = 238) and healthy (N = 229) individuals, combining voxel-wise- $p < 0.0005$  and FWE<sub>c</sub>=108 voxels for VOR modelling and 88 voxels for RA modelling, corresponding to cluster- $p$ FWE<sub>c</sub><0.05. See supplementary Table for the full table with cluster sizes, MNI coordinates and peak T-values of clusters, as well as labels under five voxels.



**Supplementary Table 4. Compare of RDM-fc7 in Visual Object Recognition between AUD and individual**

| <b>Lobe</b>   | <b>Brain regions</b> | <b>Regions size</b> | <b>Cluster size</b> | <b>MNI coordinates</b> | <b>tmax</b> |
|---------------|----------------------|---------------------|---------------------|------------------------|-------------|
| Frontal Lobe  | Precentral_R         | 74                  | 122                 | 48 -16 50              | 4.579       |
| Parietal Lobe | Postcentral_R        | 48                  |                     |                        |             |

**Supplementary Table 5. Connectivity from the Neural Pattern**

| Seeds                 | AAI Label (size)                                                                                                                                                                                                                                                                                                                           | Brodman Label (size)                                                                                                                                                                                                                                                                                                                                           | tmax  |
|-----------------------|--------------------------------------------------------------------------------------------------------------------------------------------------------------------------------------------------------------------------------------------------------------------------------------------------------------------------------------------|----------------------------------------------------------------------------------------------------------------------------------------------------------------------------------------------------------------------------------------------------------------------------------------------------------------------------------------------------------------|-------|
| Positive Connectivity |                                                                                                                                                                                                                                                                                                                                            |                                                                                                                                                                                                                                                                                                                                                                |       |
| RA1                   | Angular_R(125)<br>Lateral_Occipital_superior_R(100)                                                                                                                                                                                                                                                                                        | BA_40: supramarginal gyrus (50)<br>BA_39: angular gyrus (7)                                                                                                                                                                                                                                                                                                    | 4.196 |
| RA2                   | Postcentral_R(191)<br>Supramarginal_anterior_R(50)                                                                                                                                                                                                                                                                                         | BA_2: primary somatosensory cortex (postcentral gyrus) (36)<br>BA_40: supramarginal gyrus (19)<br>BA_3: primary somatosensory cortex (postcentral gyrus) (7)<br>BA_4: primary motor cortex (precentral gyrus) (39)<br>BA_3: primary somatosensory cortex (postcentral gyrus) (8)<br>BA_6: premotor cortex and supplementary motor cortex (7)                   | 4.827 |
| RA4                   | Inferior_Temporal_L(174)<br>Inferior_Temporal_R(99)<br>Lateral_Occipital_inferior_L(97)<br>Temporal_Fusiform_posterior_L(78)<br>Lateral_Occipital_inferior_R(29)<br>Middle_Temporal_L(27)<br>Temporal_Occipital_Fusiform_L(25)<br>Inferior_Temporal_posterior_L(6)<br>Middle_Temporal_R(4)<br>Cerebellum_6_L(4)<br>Occipital_Fusiform_L(3) | BA_37: fusiform gyrus (14)<br>BA_19: associative visual cortex (V3, V4 & V5) (11)<br>BA_37: fusiform gyrus (68)<br>BA_20: inferior temporal gyrus (48)<br>BA_19: associative visual cortex (V3, V4 & V5) (12)                                                                                                                                                  | 4.701 |
| RA5                   | Cingulate_posterior(253)<br>Cingulate_anterior(4)                                                                                                                                                                                                                                                                                          | BA_23: cingulate cortex (87)<br>BA_31: dorsal posterior cingulate cortex (10)<br>BA_24: cingulate cortex (4)                                                                                                                                                                                                                                                   | 4.622 |
| RA6                   | Parietal_Operculum_L(129)<br>Supramarginal_anterior_L(57)<br>Planum_Temporale_L(22)<br>Superior_Temporal_posterior_L(7)                                                                                                                                                                                                                    | BA_40: supramarginal gyrus (84)<br>BA_42: primary auditory cortex (Heschl gyrus) (39)<br>BA_13: insular cortex (10)                                                                                                                                                                                                                                            | 4.823 |
| RA9                   | Angular_R(391)<br>Middle_Frontal_R(328)<br>Frontal_Pole_R(289)<br>Cingulate_posterior(101)<br>Supramarginal_posterior_R(61)<br>Lateral_Occipital_superior_R(45)<br>Cingulate_anterior(11)                                                                                                                                                  | BA_10: anterior prefrontal cortex (112)<br>BA_9: dorsolateral prefrontal cortex (22)<br>BA_24: cingulate cortex (32)<br>BA_23: cingulate cortex (21)<br>BA_8: frontal eye fields (72)<br>BA_9: dorsolateral prefrontal cortex (71)<br>BA_6: premotor cortex and supplementary motor cortex (4)<br>BA_40: supramarginal gyrus (204)<br>BA_39: angular gyrus (1) | 5.146 |

|                       |                                                                                                                                                                                            |                                                                                                                                                                                                                                                                                                                                                                             |       |
|-----------------------|--------------------------------------------------------------------------------------------------------------------------------------------------------------------------------------------|-----------------------------------------------------------------------------------------------------------------------------------------------------------------------------------------------------------------------------------------------------------------------------------------------------------------------------------------------------------------------------|-------|
| RA10                  | Cingulate_posterior(541)<br>Precuneous(434)<br>Lateral_Occipital_superior_L(154)<br>Superior_Parietal_Lobule_L(1)                                                                          | BA_7: visuo-motor coordination (superior parietal lobule) (212)<br>BA_31: dorsal posterior cingulate cortex (168)<br>BA_23: cingulate cortex (68)<br>BA_24: cingulate cortex (17)<br><br>BA_7: visuo-motor coordination (superior parietal lobule) (46)<br>BA_39: angular gyrus (4)<br>BA_19: associative visual cortex (V3, V4 & V5) (2)<br>BA_40: supramarginal gyrus (2) | 7.410 |
| VOR1                  | Precentral_R(79)<br>Postcentral_R(34)<br>Central_Opercular_R(5)                                                                                                                            | BA_6: premotor cortex and supplementary motor cortex (39)<br>BA_4: primary motor cortex (precentral gyrus) (16)                                                                                                                                                                                                                                                             | 4.092 |
| Negative Connectivity |                                                                                                                                                                                            |                                                                                                                                                                                                                                                                                                                                                                             |       |
| RA1                   | Lateral_Occipital_superior_R(357)<br>Lateral_Occipital_inferior_R(29)                                                                                                                      | BA_19: associative visual cortex (V3, V4 & V5) (51)<br>BA_18: secondary visual cortex (V2) (8)<br>BA_31: dorsal posterior cingulate cortex (7)<br>BA_7: visuo-motor coordination (superior parietal lobule) (2)                                                                                                                                                             | 5.228 |
| RA4                   | Supramarginal_posterior_R(118)<br>Angular_R(37)<br>Supramarginal_anterior_R(14)                                                                                                            | BA_40: supramarginal gyrus (72)<br>BA_2: primary somatosensory cortex (postcentral gyrus) (1)                                                                                                                                                                                                                                                                               | 4.316 |
| RA5                   | Lateral_Occipital_inferior_L(192)<br>Lateral_Occipital_inferior_R(92)<br>Middle_Temporal_L(28)<br>Middle_Temporal_R(24)                                                                    | BA_37: fusiform gyrus (74)<br>BA_39: angular gyrus (16)<br>BA_19: associative visual cortex (V3, V4 & V5) (6)<br>BA_37: fusiform gyrus (24)<br>BA_19: associative visual cortex (V3, V4 & V5) (3)                                                                                                                                                                           | 5.280 |
| RA8                   | Lateral_Occipital_superior_R(171)<br>Lateral_Occipital_inferior_R(3)                                                                                                                       | BA_19: associative visual cortex (V3, V4 & V5) (3)<br>BA_39: angular gyrus (3)                                                                                                                                                                                                                                                                                              | 5.620 |
| RA9                   | Cingulate_posterior(204)<br>Lingual_R(189)<br>Lingual_L(155)<br>Vermis_4_5(105)<br>Temporal_Fusiform_posterior_R(65)<br>Parahippocampal_posterior_R(61)<br>Parahippocampal_posterior_L(46) | BA_19: associative visual cortex (V3, V4 & V5) (83)<br>BA_30: part of the cingulate cortex (66)<br>BA_36: perirhinal cortex & entorhinal area (62)<br>BA_37: fusiform gyrus (43)                                                                                                                                                                                            | 5.214 |

|      |                                   |                                                     |       |
|------|-----------------------------------|-----------------------------------------------------|-------|
|      | Temporal_Occipital_Fusiform_R(40) | BA_29: retrosplenial cingulate cortex (30)          |       |
|      | Temporal_Fusiform_posterior_L(39) | BA_20: inferior temporal gyrus (11)                 |       |
|      | Precuneous(36)                    | BA_27: piriform cortex (6)                          |       |
|      | Cerebelum_4_5_L(27)               |                                                     |       |
|      | Temporal_Occipital_Fusiform_L(22) |                                                     |       |
|      | Thalamus_r(17)                    |                                                     |       |
|      | Hippocampus_r(14)                 |                                                     |       |
|      | Cerebelum_4_5_R(14)               |                                                     |       |
|      | Hippocampus_l(8)                  |                                                     |       |
|      | Vermis_3(1)                       |                                                     |       |
| RA11 | Lingual_R(87)                     | BA_19: associative visual cortex (V3, V4 & V5) (33) | 4.916 |
|      | Cingulate_posterior_(56)          | BA_30: part of the cingulate cortex (19)            |       |
|      | Temporal_Occipital_Fusiform_R(33) | BA_37: fusiform gyrus (15)                          |       |
|      | Precuneous(13)                    | BA_36: perirhinal cortex & ectorhinal area (8)      |       |
|      | Parahippocampal_posterior_R(13)   | BA_29: retrosplenial cingulate cortex (3)           |       |
|      | Temporal_Fusiform_posterior_R(2)  |                                                     |       |
|      | Hippocampus_r(2)                  |                                                     |       |

**Supplementary Table 6. The support vector weights of ROIs in relapse prediction**

| ROI Names | Weight  | AAL Label                                                                                                                                                                                                                     | Brodman Label                                                                                                                                                                               |
|-----------|---------|-------------------------------------------------------------------------------------------------------------------------------------------------------------------------------------------------------------------------------|---------------------------------------------------------------------------------------------------------------------------------------------------------------------------------------------|
| RA11      | 0.4802  | Lingual_R (77)<br>Vermis_3 (5)<br>Cerebelum_4_5_R (4)<br>ParaHippocampal_R (2)<br>Thalamus_R (2)                                                                                                                              | BA30: cingulate cortex (12)<br>BA27: piriform cortex (9)<br>BA19: associative visual cortex_V3, V4<br>& V5 (2)                                                                              |
| RA8       | 0.4131  | Calcarine_L (81)<br>Lingual_L (6)<br>Precuneus_L (1)                                                                                                                                                                          | BA21: middle temporal gyrus (55)<br>BA30: cingulate cortex (30)<br>BA18: secondary visual cortex_V2 (3)                                                                                     |
| RA9       | 0.4007  | Lingual_R (57)<br>Calcarine_R (45)<br>Vermis_4_5 (13)                                                                                                                                                                         | BA30: cingulate cortex (34)<br>BA18: secondary visual cortex_V2 (12)<br>BA29: cingulate cortex (1)                                                                                          |
| VOR1      | 0.2508  | Supp_Motor_Area_R (111)<br>Frontal_Sup_R (3)                                                                                                                                                                                  | BA6: premotor cortex and supplementary motor cortex (12)                                                                                                                                    |
| VOR2      | 0.0816  | Precentral_R (74)<br>Postcentral_R (46)                                                                                                                                                                                       | BA4: primary motor cortex (36)<br>BA3: primary somatosensory cortex (27)                                                                                                                    |
| RA7       | -0.0501 | Temporal_Mid_L (109)<br>Temporal_Sup_L (9)                                                                                                                                                                                    | BA21: middle temporal gyrus (55)                                                                                                                                                            |
| RA4       | -0.0809 | Putamen_R (91)<br>Caudate_R (75)<br>Pallidum_R (19)<br>Hippocampus_L (16)<br>Olfactory_R (12)<br>Amygdala_L (12)<br>Frontal_Mid_Orb_R (3)<br>Frontal_Inf_Orb_R (2)<br>Insula_R (2)<br>Frontal_Sup_Orb_R (1)<br>Pallidum_L (1) | BA25: subgenual area (12)<br>BA47: pars orbitalis, part of the inferior frontal gyrus (3)<br>BA11: orbitofrontal area (2)<br>BA13: insular cortex (1)<br>BA34: dorsal entorhinal cortex (1) |
| RA1       | -0.1233 | Occipital_Sup_L (140)<br>Cuneus_L (67)<br>Occipital_Mid_L (57)                                                                                                                                                                | BA18: secondary visual cortex_V2 (35)<br>BA19: associative visual cortex (V3, V4<br>& V5) (32)<br>BA31: cingulate cortex (5)<br>BA7: visuo-motor coordination (3)                           |
| RA12      | -0.1446 | Frontal_Inf_Tri_R (114)                                                                                                                                                                                                       | BA45: part of Broca area (45)<br>BA46: dorsolateral prefrontal cortex (6)                                                                                                                   |
| RA2       | -0.1449 | Temporal_Mid_R (327)<br>Temporal_Sup_R (136)<br>Temporal_Pole_Mid_R (6)<br>Amygdala_R (3)<br>Temporal_Inf_R (1)                                                                                                               | BA21: middle temporal gyrus (192)                                                                                                                                                           |
| RA5       | -0.2027 | Precentral_R (114)<br>Frontal_Inf_Oper_R (105)<br>Rolandic_Oper_R (20)<br>Insula_R (12)<br>Frontal_Mid_R (7)                                                                                                                  | BA6: premotor cortex and supplementary motor cortex (38)<br>BA9: dorsolateral prefrontal cortex (13)<br>BA13: insular cortex (13)<br>BA44: part of Broca area (6)                           |

|      |         |                                                                                                                                                                              |                                                                                                                                                                                                                    |
|------|---------|------------------------------------------------------------------------------------------------------------------------------------------------------------------------------|--------------------------------------------------------------------------------------------------------------------------------------------------------------------------------------------------------------------|
| RA3  | -0.3025 | Frontal_Inf_Tri_L (185)<br>Frontal_Inf_Orb_L (147)<br>Frontal_Mid_Orb_L (83)<br>Frontal_Mid_L (44)                                                                           | BA47: pars orbitalis, part of the inferior frontal gyrus (58)<br>BA11: orbitofrontal area (31)<br>BA10: anterior prefrontal cortex (9)<br>BA46: dorsolateral prefrontal cortex (2)<br>BA45: part of Broca area (1) |
| RA10 | -1.4421 | Occipital_Mid_R (67)<br>Occipital_Sup_R (38)                                                                                                                                 | BA19: associative visual cortex_V3, V4 & V5 (16)                                                                                                                                                                   |
| RA6  | -1.9085 | Frontal_Mid_L (204)<br>Precentral_L (165)<br>Frontal_Sup_L (119)<br>Frontal_Inf_Oper_L (111)<br>Frontal_Inf_Tri_L (60)<br>Frontal_Sup_Medial_L (26)<br>Supp_Motor_Area_L (7) | BA8: frontal eye fields (193)<br>BA9: dorsolateral prefrontal cortex (134)<br>BA6: premotor cortex and supplementary motor cortex (13)<br>BA46: dorsolateral prefrontal cortex (1)                                 |

**Supplementary Figure 1. Receiver operating characteristic (ROC) curves in relapse prediction**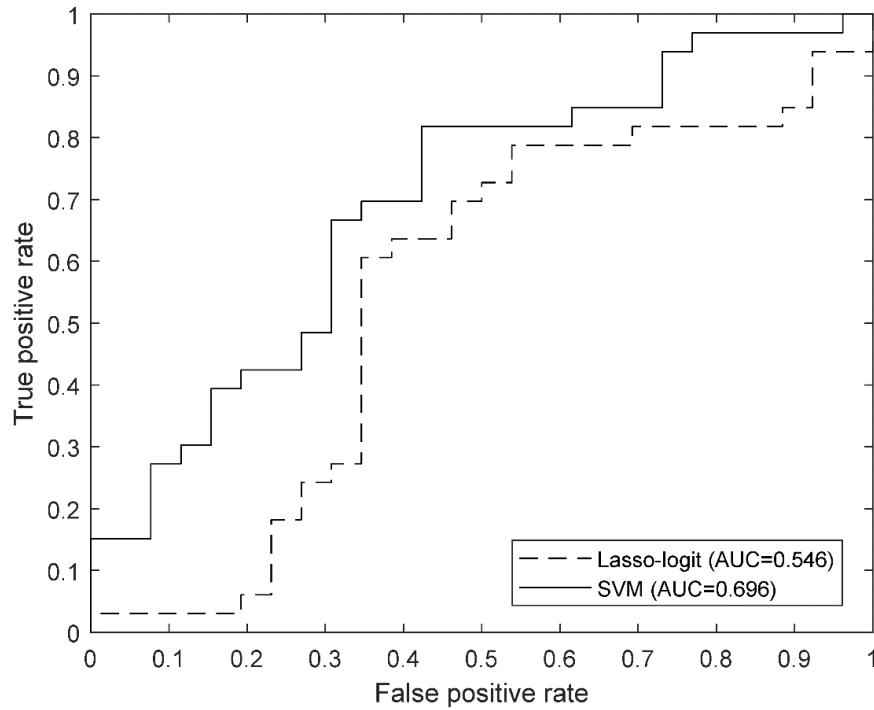

## Supplementary Reference

1. Kivlahan DR, Sher KJ, Donovan DM. The Alcohol Dependence Scale: a validation study among inpatient alcoholics. *Journal of studies on alcohol* 1989;50(2):170-75.
2. Bohn MJ, Krahn DD, Staehler BA. Development and Initial Validation of a Measure of Drinking Urges in Abstinent Alcoholics. *Alcoholism: Clinical and Experimental Research* 1995;19(3):600-06. doi: <https://doi.org/10.1111/j.1530-0277.1995.tb01554.x>
3. Anton RF, Moak DH, Latham P. The Obsessive Compulsive Drinking Scale: a self-rated instrument for the quantification of thoughts about alcohol and drinking behavior. *Alcoholism: Clinical and Experimental Research* 1995;19(1):92-99.
4. Mann K, Ackermann K. Die OCDS-G: Psychometrische Kennwerte der deutschen Version der obsessive compulsive drinking scale. *Sucht* 2000;46(2):90-100.
5. Scheurich A, Müller MJ, Anghelescu I, et al. Reliability and validity of the form 90 interview. *European addiction research* 2005;11(1):50-6. doi: 10.1159/000081417 [published Online First: 2004/12/21]
6. Vollstädt-Klein S, Wichert S, Rabinstein J, et al. Initial, habitual and compulsive alcohol use is characterized by a shift of cue processing from ventral to dorsal striatum. *Addiction* 2010;105(10):1741-49. doi: <https://doi.org/10.1111/j.1360-0443.2010.03022.x>
7. Lang PJ, Bradley MM, Cuthbert BN. International affective picture system (IAPS): Technical manual and affective ratings. *NIMH Center for the Study of Emotion and Attention* 1997;1(39-58):3.
8. Simonyan K, Zisserman A. Very deep convolutional networks for large-scale image recognition. *arXiv preprint arXiv:14091556* 2014
9. Xie S, Kaiser D, Cichy RM. Visual Imagery and Perception Share Neural Representations in the Alpha Frequency Band. *Current Biology* 2020;30(13):2621-27.e5. doi: <https://doi.org/10.1016/j.cub.2020.04.074>
10. Eickenberg M, Gramfort A, Varoquaux G, et al. Seeing it all: Convolutional network layers map the function of the human visual system. *NeuroImage* 2017;152:184-94.
11. Imagenet: A large-scale hierarchical image database 2009. Ieee.
12. Friston KJ, Buechel C, Fink GR, et al. Psychophysiological and modulatory interactions in neuroimaging. *Neuroimage* 1997;6(3):218-29.
13. Whitfield-Gabrieli S, Nieto-Castanon A. Conn: a functional connectivity toolbox for correlated and anticorrelated brain networks. *Brain connectivity* 2012;2(3):125-41.
14. De Santis S, Bach P, Pérez-Cervera L, et al. Microstructural White Matter Alterations in Men With Alcohol Use Disorder and Rats With Excessive Alcohol Consumption During Early Abstinence. *JAMA Psychiatry* 2019;76(7):749-58. doi: 10.1001/jamapsychiatry.2019.0318
15. Vollstädt-Klein S, Loeber S, Kirsch M, et al. Effects of Cue-Exposure Treatment on Neural Cue Reactivity in Alcohol Dependence: A Randomized Trial. *Biological Psychiatry* 2011;69(11):1060-66. doi: <https://doi.org/10.1016/j.biopsych.2010.12.016>
16. Gerchen MF, Weiss F, Kirsch M, et al. Dynamic frontostriatal functional peak connectivity (in alcohol use disorder). *Human Brain Mapping* 2021;42(1):36-46. doi: <https://doi.org/10.1002/hbm.25201>
17. Bach P, Zois E, Vollstädt-Klein S, et al. Association of the alcohol dehydrogenase gene polymorphism rs1789891 with gray matter brain volume, alcohol consumption, alcohol



- craving and relapse risk. *Addiction Biology* 2019;24(1):110-20. doi: <https://doi.org/10.1111/adb.12571>
18. Karl D, Bumb JM, Bach P, et al. Nalmefene attenuates neural alcohol cue-reactivity in the ventral striatum and subjective alcohol craving in patients with alcohol use disorder. *Psychopharmacology* 2021;238(8):2179-89. doi: 10.1007/s00213-021-05842-7
  19. Hansson AC, Koopmann A, Uhrig S, et al. Oxytocin Reduces Alcohol Cue-Reactivity in Alcohol-Dependent Rats and Humans. *Neuropsychopharmacology* 2018;43(6):1235-46. doi: 10.1038/npp.2017.257
